# Supplementary material
Source: PubMed Central journal article supplement (PMC4117168)
Supplement: supp_WNL.0000000000000564_Tables_e-1-2-Figure_e-1.pdf [file supp_WNL.0000000000000564_Tables_e-1-2-Figure_e-1.pdf]

## Appendix

**Table e-1. Sensitivity analyses for HIV dementia, HIV-CAUSAL Collaboration, 1998-2013.**

| Model                                                                       | Adjusted Hazard Ratio* for CPE score |             |             |              |             |              |      |              |
|-----------------------------------------------------------------------------|--------------------------------------|-------------|-------------|--------------|-------------|--------------|------|--------------|
|                                                                             | Low                                  | 95 % CI     | Medium      | 95% CI       | High        | 95% CI       |      |              |
| <b>Primary analysis</b>                                                     | <b>1.00</b>                          | (reference) | <b>1.01</b> | (0.73, 1.39) | <b>1.74</b> | (1.15, 2.65) |      |              |
| Ritonavir-boosted nelfinavir CPE rank 2 and unboosted darunavir CPE rank 3  | 1.00                                 | (reference) | 1.01        | (0.74, 1.38) | 1.74        | (1.15, 2.65) |      |              |
| Ritonavir-boosted nelfinavir CPE rank 1 and unboosted darunavir CPE rank 3  | 1.00                                 | (reference) | 1.01        | (0.74, 1.38) | 1.74        | (1.15, 2.65) |      |              |
| Ritonavir-boosted nelfinavir CPE rank 2 and un-boosted darunavir CPE rank 2 | 1.00                                 | (reference) | 1.01        | (0.74, 1.38) | 1.74        | (1.15, 2.65) |      |              |
| Restricted to VACS and adjusted for the VACS Index                          | 1.00                                 | (reference) | 1.04        | (0.64, 1.68) | 1.59        | (0.82, 3.06) |      |              |
| Excluding VACS                                                              | 1.00                                 | (reference) | 1.06        | (0.69, 1.65) | 2.15        | (1.24, 3.73) |      |              |
| Additionally weighted by the inverse probability of remaining alive         | 1.00                                 | (reference) | 1.03        | (0.73, 1.45) | 1.91        | (1.18, 3.09) |      |              |
| Restricting to those initiating therapy prior to 2008                       | 1.00                                 | (reference) | 1.07        | (0.77, 1.47) | 1.77        | (1.16, 2.70) |      |              |
|                                                                             | < 6                                  | 95 % CI     | 6-7         | 95 % CI      | 8-9         | 95 % CI      | > 9  | 95 % CI      |
| CPE score as a 4 category variable                                          | 1.00                                 | (reference) | 0.80        | (0.51, 1.27) | 0.84        | (0.52, 1.37) | 1.45 | (0.84, 2.53) |

CI, confidence interval.

Confidence intervals were obtained using robust variance estimates and are conservative.

\* All hazard ratios adjusted for cohort, month of follow-up, baseline CD4 cell count, baseline HIV RNA level, sex, acquisition group, calendar year, age, geographic origin, race, years since HIV infection, and type of drug regimen, as well as time-varying CD4 cell count, RNA level, time since last measurement, and AIDS. Stabilized inverse probability weights were used to account for censoring due to infrequent follow-up.

Table e-2 HIV dementia hazard ratios when first year of follow-up excluded, HIV-CAUSAL Collaboration, 1998-2013.

| CPE Score | Person-Years | No. of Events | Unadjusted   |              | Adjusted       |              |
|-----------|--------------|---------------|--------------|--------------|----------------|--------------|
|           |              |               | Hazard Ratio | 95% CI       | Hazard Ratio * | 95% CI       |
| Low       | 140,944      | 75            | 1.00         | (reference)  | 1.00           | (reference)  |
| Medium    | 86,787       | 38            | 0.75         | (0.51, 1.11) | 0.83           | (0.54, 1.27) |
| High      | 32,092       | 22            | 1.37         | (0.85, 2.21) | 1.60           | (0.94, 2.75) |

CI, confidence interval.

Confidence intervals were obtained using robust variance estimates and are conservative.

\* Adjusted for cohort, month of follow-up, baseline CD4 cell count, baseline HIV RNA level, sex, acquisition group, calendar year, age, geographic origin, race, years since HIV infection, and type of drug regimen, as well as time-varying CD4 cell count, RNA level, time since last measurement, and AIDS. Stabilized inverse probability weights were used to account for censoring due to infrequent follow-up.

Figure e-1. Estimated Log Hazard Ratios and 95% Confidence Intervals

A

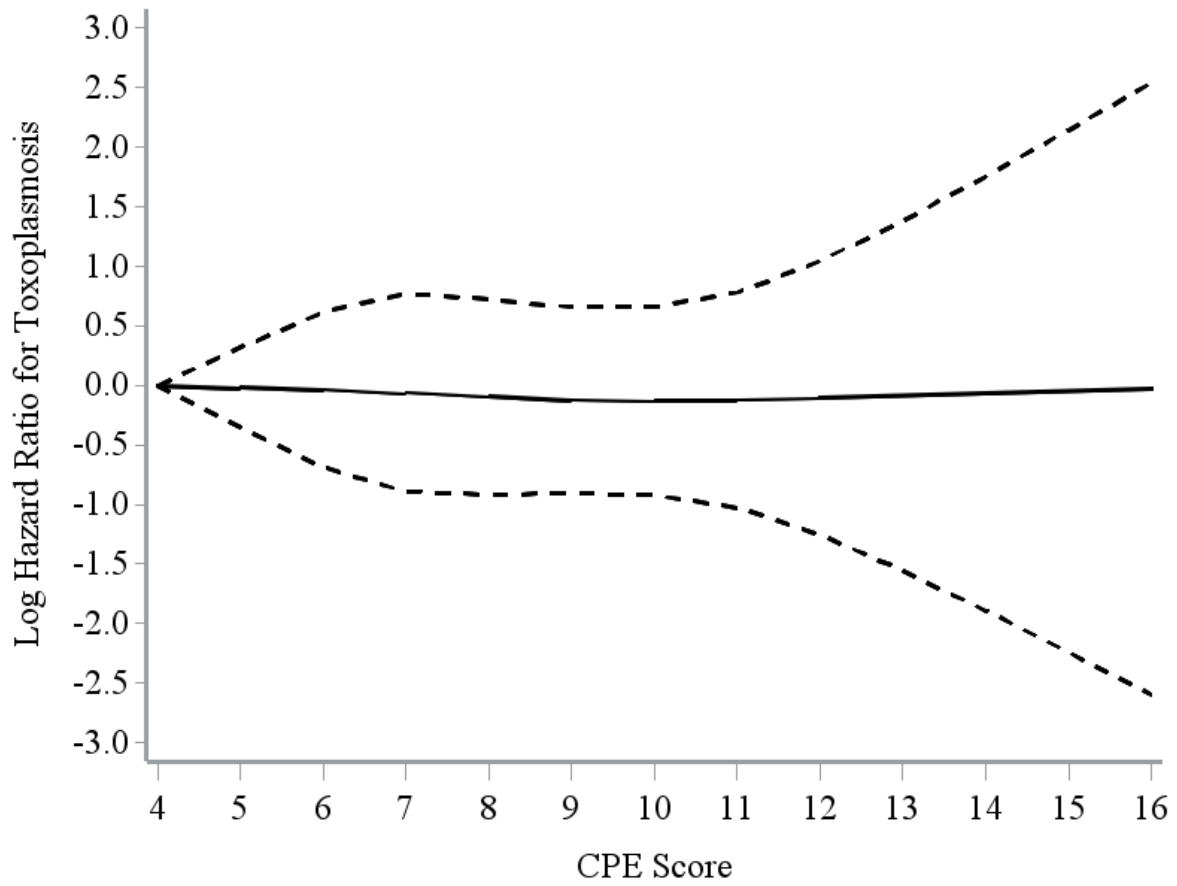

**B**

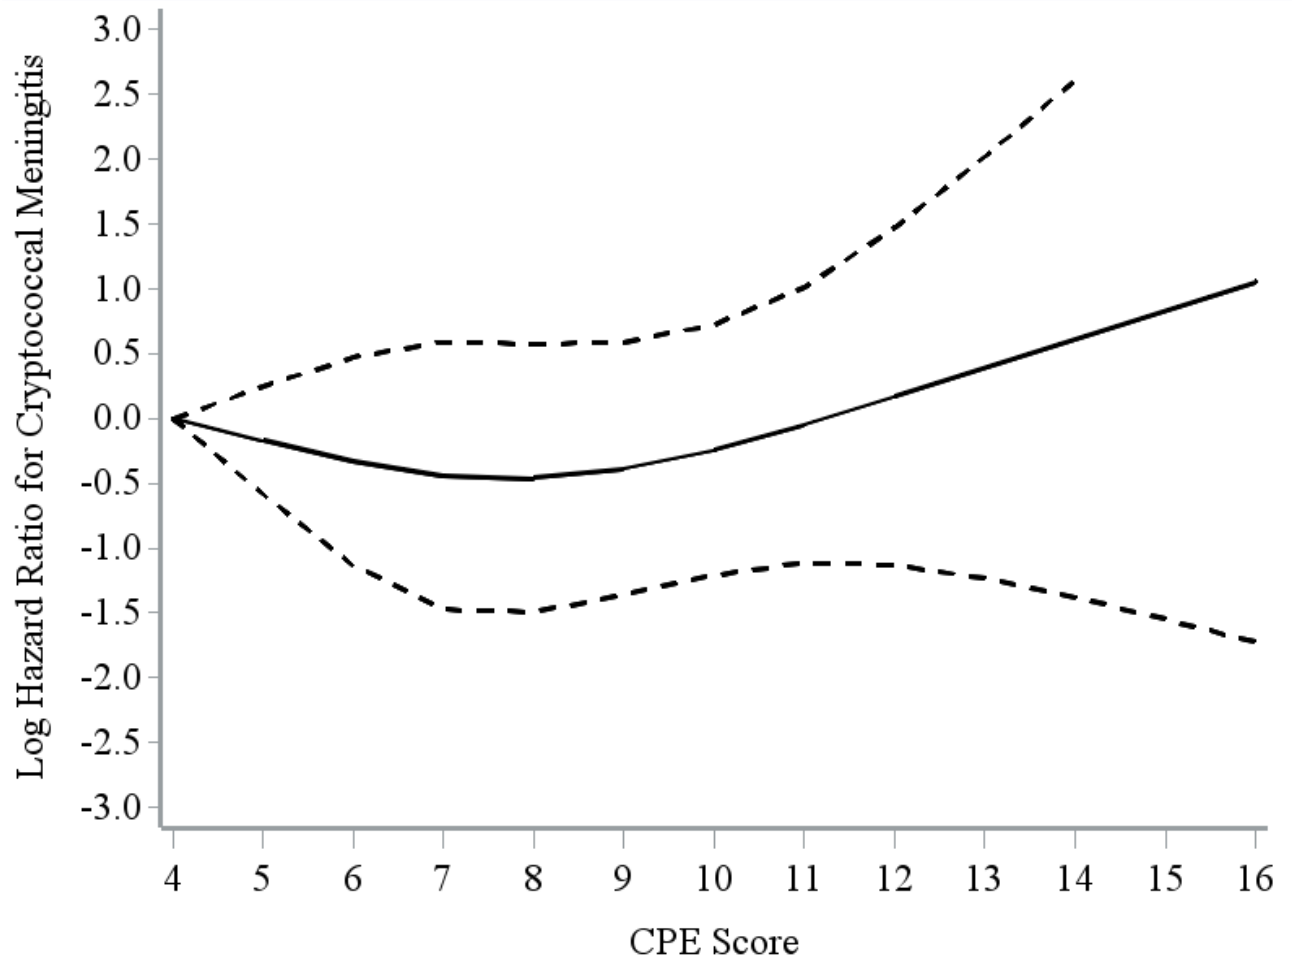

C

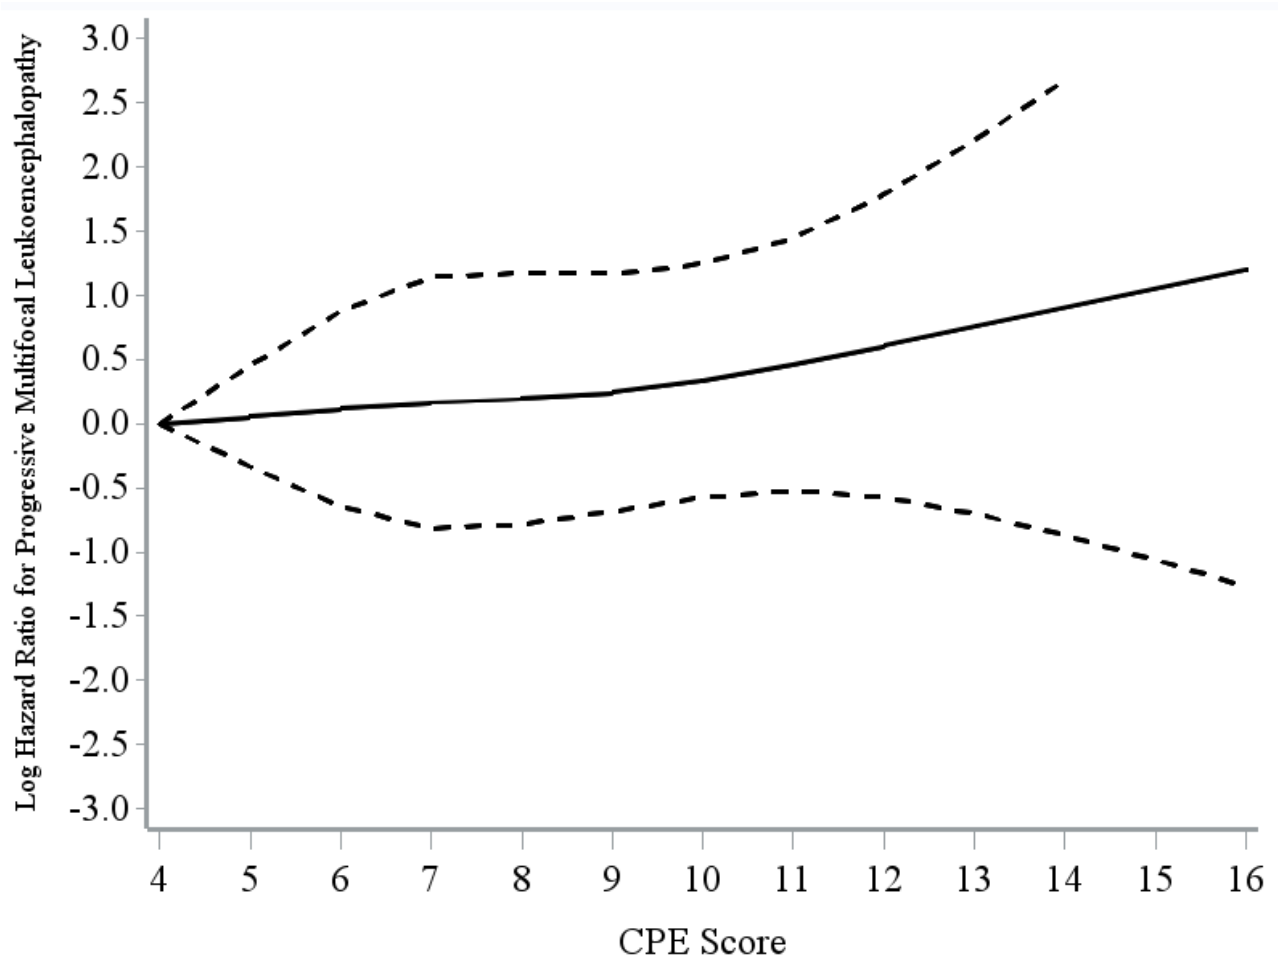

**Estimated Log Hazard Ratios and 95% Confidence Intervals for Toxoplasmosis (A), cryptococcal meningitis (B), and progressive multifocal leukoencephalopathy (C) comparing each CPE score to a CPE score of four (lowest), HIV-CAUSAL Collaboration 1998-2013.**
